# Supplementary material for: Identification of an additional protein involved in mannan biosynthesis
Source: PubMed Central journal article supplement (PMC3558879; doi:10.1111/tpj.12019), 2012-10-19
Supplement: tpj0073-0105-SD1.pdf [file tpj0073-0105-SD1.pdf]

**TfMSR** 1 MNSMEIRQAFAGLLTLSMFIIMLGNIKKDHFY-----PAEEVEIQTTTEVSOHDLATV  
**AtMSR1** 1 M-GVDLRQVVAGILTIITMFVMLGQMLHRDYFDSIQEKAQGDADIEFEGSKVSVKD-GLV  
**AtMSR2** 1 M-GVDLRQVVAGILTIITMFVMLGQMLHRDYFDAVQEKVQGDADHIEFHGSKVAVED-GLV

**TfMSR** 54 SHISQKSK----QNDKALKPCWNPPTLKEVEQSKGFTIFSLTNGPEYHIAQVADAVVVAK  
**AtMSR1** 59 GTVE-GSKGLWMEDNTDLTPCWPTLLSDAVSSKGYVTFSLTNGPEYHISQITDAVMVAK  
**AtMSR2** 59 RAFAAGIKGPWMEDSHELKPCWSISQSDAVSSKGYVTFSLTNGPEYHVSQITDAVMVAK

**TfMSR** 110 YLGATLVLPDIKNSKSGNSMNLGDIYDVENVLNKLNGLVKVTKTLPFHVSTRNTPIVRVP  
**AtMSR1** 118 HLGATLVLPDIRGSKPGDERNFEDIYDAKLIKSLENVVKVVKLPPEEVSLRNMAIVKVP  
**AtMSR2** 119 HLGATLVLPDIRGSKPGDEMRFEDIYDVDKLIKLESVVKVVKLPESHVSLRDIAIVKVP

**TfMSR** 170 NKVSQDYIMKKLKPIVQAKGIKTESYFPSKN-TISRNNNSLESLLCQTMFGGTLELKKK  
**AtMSR1** 178 TRVTEDIYKEHIDPIFKSKGNIRVASYFPSVNLKSSQDGETDPVAACLAMF-GSLELQPE  
**AtMSR2** 179 TRVAEDIYKEHIDPIFKSKGNIRVTIYFPSVNLKSSQGAETDPVSCLAMF-GSLELQPA

**TfMSR** 229 IQEEAESIVQKLETWSQESNGPFVAVDLRIGSL-KNECNGKDKCKGRKQCYQGHEICEFLK  
**AtMSR1** 237 VNAAVAESMVERLRTHSRKSGGRFIAVDLRIDILEKKNCHTTGAVGSKTCYNAQEIALFLR  
**AtMSR2** 238 VNELVESMIQRLKTHSKSGGRFIAVDLRVEILEKKNCHETGAVGSKTCYNAQEIALFLR

**TfMSR** 288 RIGFGQETVIYVTQTKWSPDLNSLRYMFPKTYTKENIMSSITKKEKFINSESIEFEKATDF  
**AtMSR1** 297 KLGFDSDTTIYLTQPRWSSLNILKDIKPKTITKEAIMPASKRSKYLESVSSEYENVVIDF  
**AtMSR2** 298 KLGFDSDTTIYLTQPRWESSLNILKDIKPKTYTKEAIMPDKKTKYLELENSEYENVVIDF

**TfMSR** 348 YICSESDVFPVPSILGPFYENVAGMRTVSGKNEIIVPSEMVSPSASASEHMSPYVTTKNHL  
**AtMSR1** 357 YISSRSDVFPVAISGLFYANTVVGKRIALGKPOVLVPAEISSETSGLATDFISPYISKKNHL  
**AtMSR2** 358 YISSRSDVFPVAIPGLFYANTVVGKRIALGKPOVLVPAEISGTSGLPANYISPYISKKNHL

**TfMSR** 408 AYKCFC  
**AtMSR1** 417 AYSCFC  
**AtMSR2** 418 AYSCFC
