# Supplementary material for: Identification of an additional protein involved in mannan biosynthesis
Source: PubMed Central journal article supplement (PMC3558879; doi:10.1111/tpj.12019), 2012-10-19

**(a)**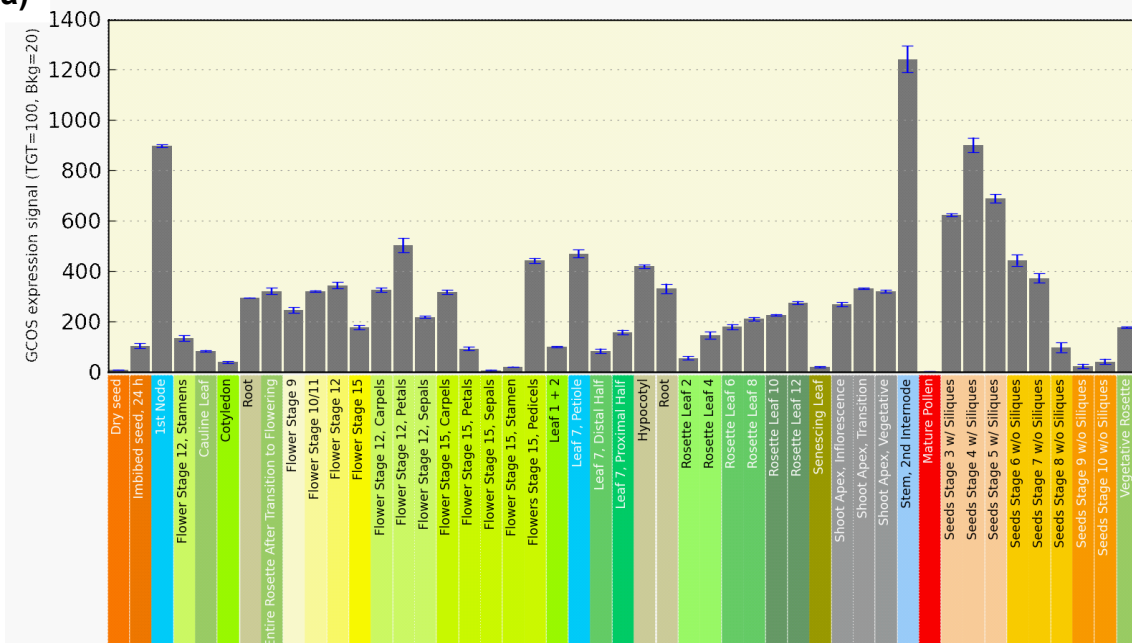**(b)**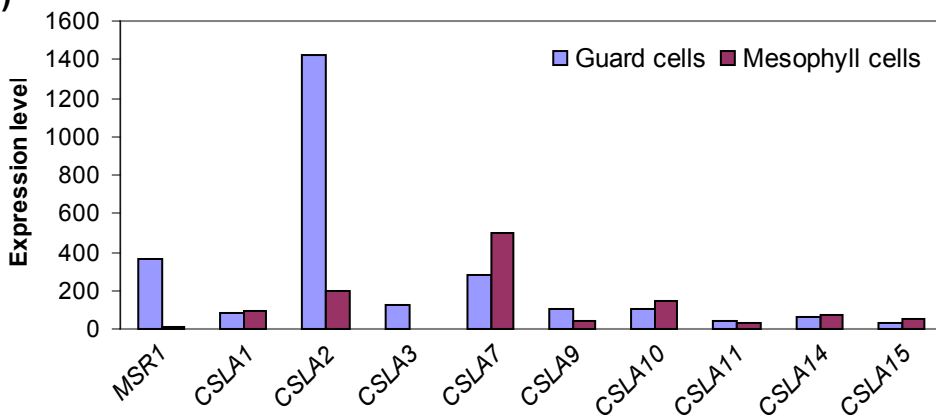**(c)**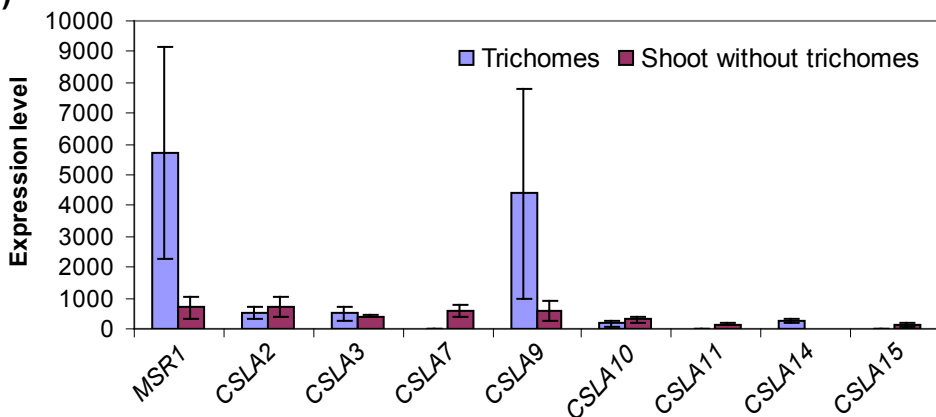**(d)**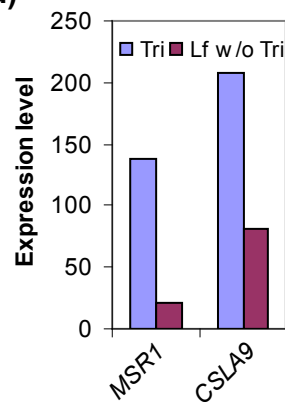

Supplement: tpj0073-0105-SD2.pdf [file tpj0073-0105-SD2.pdf]
